# Supplementary material for: MepmiRDB: a medicinal plant microRNA database
Source: Oxford University Press journal article supplement (doi:10.1093/database/baz070), 2019-01-01
Supplement: figure_s1_baz070.pdf [file figure_s1_baz070.pdf]

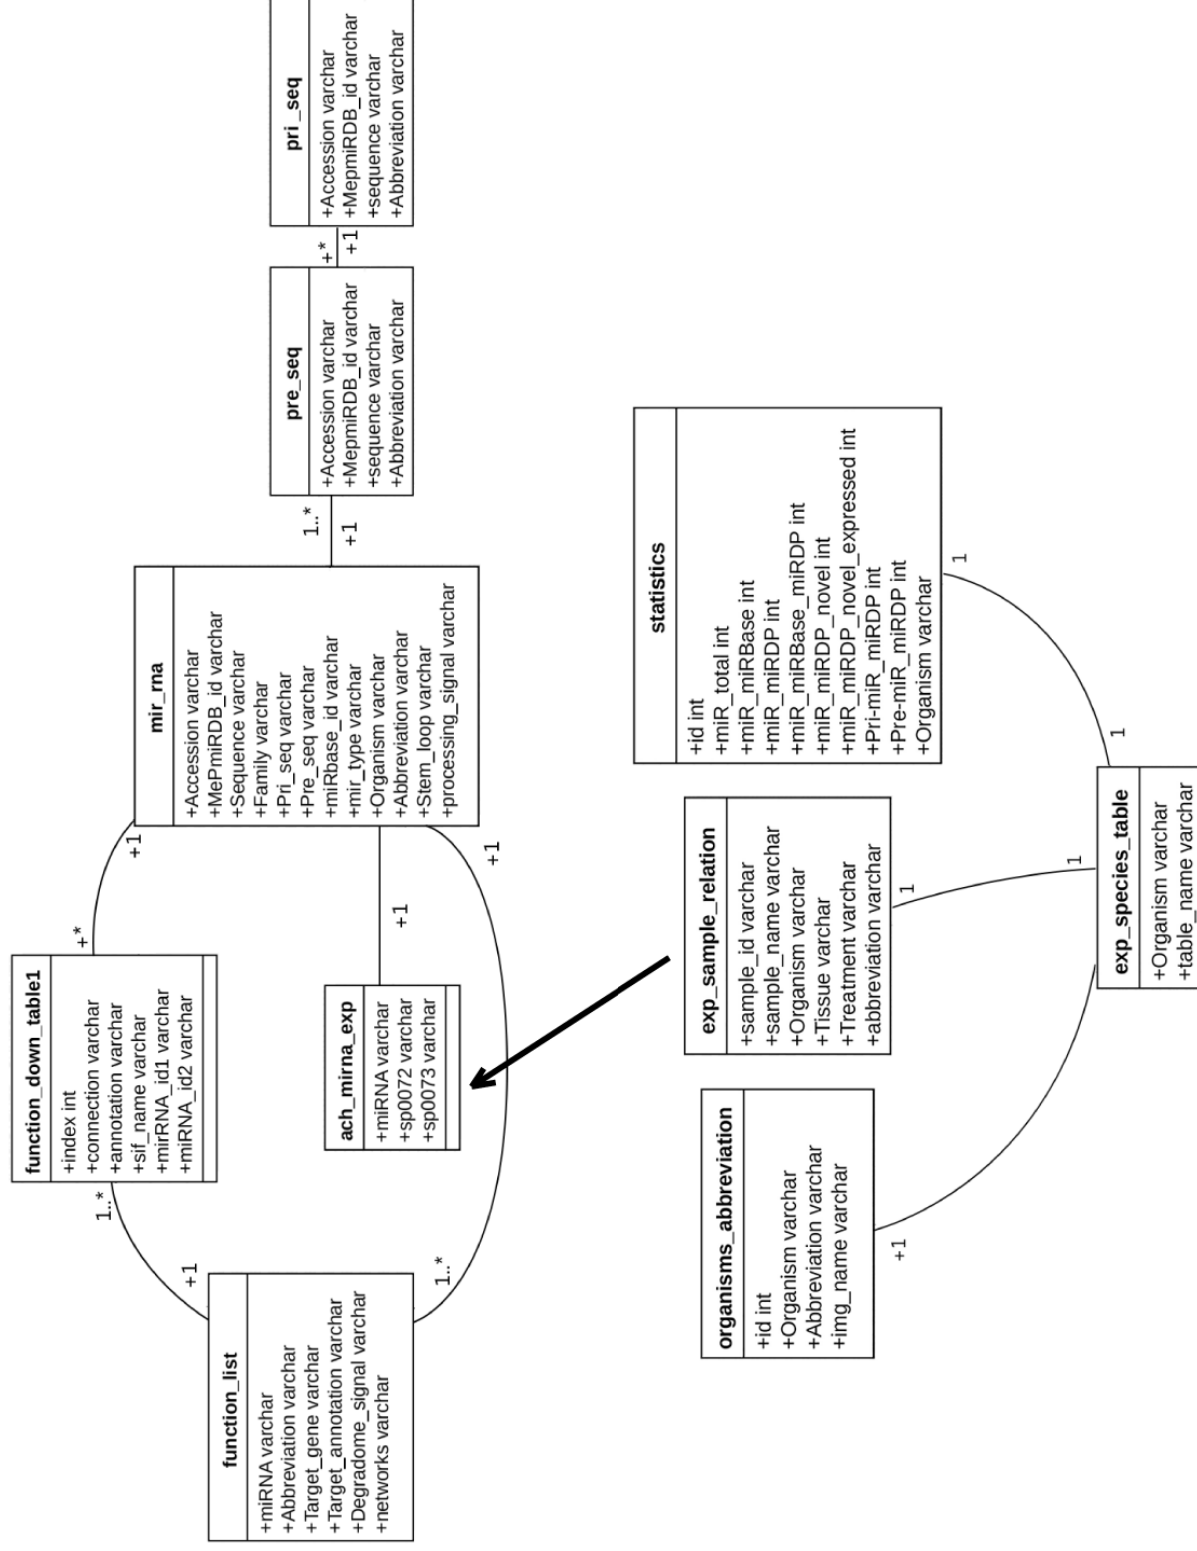

**Figure S1** Background structure of MepmiRDB. Sequence information of pri-/pre-/mature miRNAs and the expression of mature miRNAs in diverse tissues are indexed and stored in MySQL database. Expression profiles are created as individual tables for each organism.
