# Supplementary material for: MepmiRDB: a medicinal plant microRNA database
Source: Oxford University Press journal article supplement (doi:10.1093/database/baz070), 2019-01-01
Supplement: figure_s2_baz070.pdf [file figure_s2_baz070.pdf]

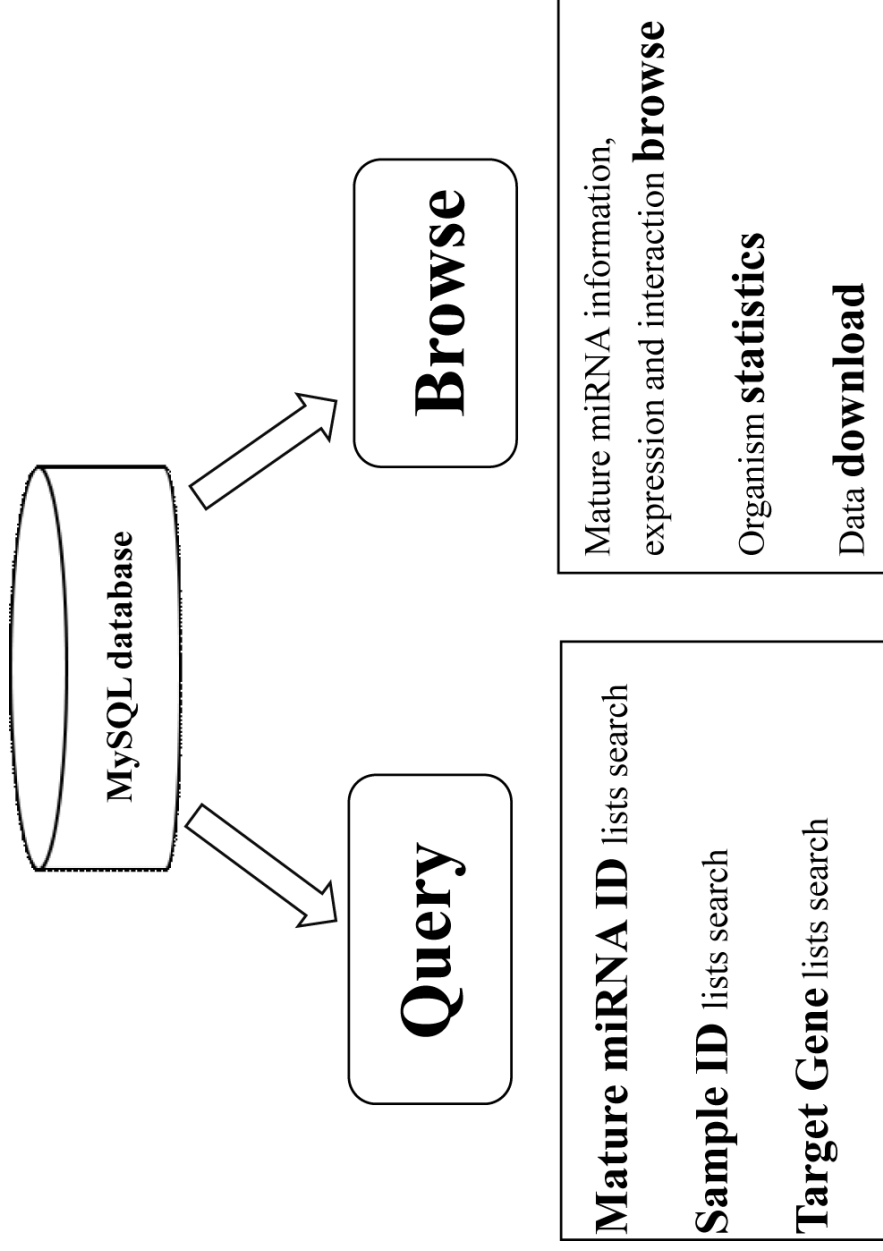

**Figure S2** Functional architecture of the MepmiRDB. MepmiRDB is an open-access database that provides the web service for browsing and querying the information of the predicted miRNAs, especially on their sequences, structures, expression profiles and interaction networks.
